# Supplementary material
Source: PubMed Central journal article supplement (PMC2642592)
Supplement: NIHMS90100-supplement-Supplementary.pdf [file NIHMS90100-supplement-Supplementary.pdf]

**Supplementary Table 1.** Clinicopathological features of primary breast cancer samples exhibiting higher nSMase3 mRNA levels than their matching normal tissues.

| <b>Patient No.</b> | <b>Age (yrs)</b> | <b>Sex</b> | <b>Tumor Type</b>                       | <b>Tumor Stage</b> |
|--------------------|------------------|------------|-----------------------------------------|--------------------|
| 2                  | 78               | Female     | Infiltrating Duct Carcinoma             | IIA                |
| 3                  | 49               | Female     | Infiltrating Duct Carcinoma             | II B               |
| 5                  | 66               | Female     | Infiltrating Duct Carcinoma             | II B               |
| 7                  | 44               | Female     | Infiltrating Duct Carcinoma             | II B               |
| 8                  | 33               | Female     | Infiltrating Duct Carcinoma             | II B               |
| 9                  | 40               | Female     | Infiltrating Duct Carcinoma             | III A              |
| 10                 | 49               | Female     | Infiltrating Duct Carcinoma             | II A               |
| 12                 | 50               | Female     | Infiltrating Duct Carcinoma             | I                  |
| 13                 | 61               | Female     | Lobular Carcinoma NOS                   | II A               |
| 16                 | 50               | Female     | Infiltrating Duct Carcinoma             | III A              |
| 17                 | 44               | Female     | Infiltrating Ductal Carcinoma           | I                  |
| 18                 | 52               | Female     | Infiltrative Ductal Carcinoma           | I                  |
| 20                 | 59               | Female     | Infiltrating Ductal Carcinoma           | I                  |
| 21                 | 50               | Female     | Infiltrating Ductal Carcinoma           | I                  |
| 22                 | 68               | Female     | Infiltrative Ductal Carcinoma           | N/A                |
| 23                 | 63               | Female     | Tubular Carcinoma                       | II                 |
| 24                 | 44               | Female     | Fibrosarcoma                            | N/A                |
| 25                 | 49               | Female     | Infiltrating Lobular Carcinoma          | N/A                |
| 26                 | 64               | Female     | Infiltrating Ductal Carcinoma           | N/A                |
| 27                 | 50               | Female     | Infiltrative Duct Carcinoma             | N/A                |
| 29                 | 66               | Female     | Infiltrative Lobular Carcinoma          | N/A                |
| 31                 | 61               | Female     | Infiltrative Lobular Carcinoma          | N/A                |
| 38                 | 62               | Female     | Infiltrating Duct Carcinoma             | I                  |
| 40                 | 52               | Female     | Infiltrating Duct Carcinoma, Metastatic | II B               |
| 41                 | 57               | Female     | Infiltrating Duct Carcinoma, Metastatic | III A              |
| 43                 | 40               | Female     | Infiltrating Duct Carcinoma             | II B               |
| 45                 | 45               | Female     | Lobular Carcinoma NOS                   | I A                |
| 46                 | 47               | Female     | Medullary Carcinoma NOS                 | II A               |
| 47                 | 60               | Female     | Infiltrating Duct Carcinoma             | III A              |

**Supplementary Table 2.** Clinicopathological features of primary rectal cancer samples exhibiting higher nSMase3 mRNA levels than their matching normal tissues.

| <b>Patient No.</b> | <b>Age (yrs)</b> | <b>Sex</b> | <b>Tumor Type</b>              | <b>Tumor Stage</b> |
|--------------------|------------------|------------|--------------------------------|--------------------|
| 3                  | 46               | Female     | Adenocarcinoma NOS             | II                 |
| 4                  | 63               | Female     | Adenocarcinoma NOS             | II                 |
| 5                  | 73               | Female     | Adenocarcinoma NOS             | III                |
| 8                  | 65               | Male       | Adenocarcinoma NOS             | IV B               |
| 9                  | 60               | Male       | Adenocarcinoma NOS             | N/A                |
| 10                 | 68               | Male       | Adenosquamous Carcinoma        | III B              |
| 11                 | 63               | Male       | Adenocarcinoma NOS, Metastatic | IV B               |
| 12                 | 48               | Female     | Adenocarcinoma NOS             | III B              |
| 13                 | 70               | Male       | Adenocarcinoma NOS             | III A              |
| 14                 | 66               | Male       | Adenocarcinoma NOS             | I                  |
| 15                 | 67               | Female     | Adenocarcinoma NOS             | IIA                |
| 17                 | 59               | Male       | Adenocarcinoma NOS             | III B              |
| 18                 | 64               | Male       | Adenocarcinoma NOS             | IV                 |

**Supplementary Table 3.** Clinicopathological features of primary uteran cancer samples exhibiting higher nSMase3 mRNA levels than their matching normal tissues.

| Patient No. | Age (yrs) | Sex    | Tumor Type                                 | Tumor Stage |
|-------------|-----------|--------|--------------------------------------------|-------------|
| 2           | 59        | Female | Adenocarcinoma NOS                         | I           |
| 3           | 68        | Female | Adenocarcinoma with Foci of Epidermization | I C         |
| 4           | 58        | Female | Poorly Differentiated Adenocarcinoma       | N/A         |
| 5           | 60        | Female | Squamous Cell Carcinoma NOS                | I B         |
| 6           | 50        | Female | Adenocarcinoma NOS                         | I           |
| 8           | 54        | Female | Adenocarcinoma NOS                         | I A         |
| 10          | 67        | Female | Adenocarcinoma NOS                         | I C         |
| 14          | 60        | Female | Adenocarcinoma NOS                         | N/A         |
| 15          | 60        | Female | Adenocarcinoma NOS                         | III A       |
| 16          | 76        | Female | Adenocarcinoma NOS                         | I B         |
| 18          | 41        | Female | Adenocarcinoma NOS                         | I B         |
| 19          | 59        | Female | Adenocarcinoma NOS                         | I B         |
| 20          | 62        | Female | Adenocarcinoma NOS                         | I A         |
| 21          | 60        | Female | Adenocarcinoma NOS                         | I C         |
| 22          | 56        | Female | Adenocarcinoma NOS, Metastatic             | III C       |
| 23          | 53        | Female | Endometrial Stromal Sarcoma                | I B         |
| 24          | 70        | Female | Adenocarcinoma NOS                         | I B         |
| 27          | 67        | Female | Adenocarcinoma NOS                         | I C         |
| 29          | 59        | Female | Adenocarcinoma NOS                         | I C         |
| 31          | 61        | Female | Adenocarcinoma NOS                         | I B         |
| 36          | 46        | Female | Squamous Cell Carcinoma NOS, Keratinising  | N/A         |
| 42          | 42        | Female | Squamous Cell Carcinoma NOS                | I B         |

**Supplementary Table 4.** Clinicopathological features of primary renal cancer samples exhibiting lower nSMase3 mRNA levels than their matching normal tissues.

| <b>Patient No.</b> | <b>Age (yrs)</b> | <b>Sex</b> | <b>Tumor Type</b>                   | <b>Tumor Stage</b> |
|--------------------|------------------|------------|-------------------------------------|--------------------|
| 1                  | 56               | Female     | Clear Cell Adenocarcinoma NOS       | II                 |
| 2                  | 83               | Male       | Renal Carcinoma                     | N/A                |
| 4                  | 83               | Male       | Carcinoid Tumor, Nonargentaffin NOS | N/A                |
| 5                  | 66               | Male       | Renal Cell Carcinoma                | III                |
| 6                  | 73               | Female     | Transitional Cell Carcinoma         | N/A                |
| 7                  | 44               | Female     | Renal Cell Carcinoma                | N/A                |
| 8                  | 57               | Male       | Renal Cell Carcinoma                | N/A                |
| 9                  | 73               | Male       | Renal Oncocytoma                    | N/A                |
| 10                 | 72               | Female     | Renal Cell Carcinoma                | N/A                |
| 11                 | 62               | Male       | Renal Cell Carcinoma                | N/A                |
| 13                 | 50               | Female     | Renal Cell Carcinoma                | N/A                |
| 15                 | 58               | Female     | Renal Cell Carcinoma                | N/A                |
| 16                 | 53               | Male       | Renal Cell Carcinoma                | N/A                |
| 20                 | 57               | Female     | Renal Cell Carcinoma                | I                  |
